# Supplementary material
Source: publisher figshare collection journal article supplement (https://asha.figshare.com/articles/dataset/_/28489280)
Supplement: Supplementary file 1 [file 1]

**Supplemental Material S2.** SWAL-QOL domain and total scores.

| ID   | Burden | Eating<br>Desire | Eating<br>Duration | Food<br>Selection | Communication | Fear   | Mental<br>Health | Social | Fatigue | Sleep  | Total |
|------|--------|------------------|--------------------|-------------------|---------------|--------|------------------|--------|---------|--------|-------|
| 1    | 87.50  | 100.00           | 100.00             | 100.00            | 75.00         | 100.00 | 100.00           | 100.00 | 91.67   | 50.00  | 90.42 |
| 2    | 87.50  | 100.00           | 62.50              | 75.00             | 100.00        | 93.75  | 85.00            | 100.00 | 91.67   | 75.00  | 87.04 |
| 3    | 100.00 | 100.00           | 100.00             | 100.00            | 50.00         | 100.00 | 100.00           | 75.00  | 75.00   | 75.00  | 87.50 |
| 4    | 87.50  | 25.00            | 12.50              | 75.00             | 75.00         | 25.00  | 55.00            | 65.00  | 25.00   | 0.00   | 44.50 |
| 5    | 62.50  | 100.00           | 75.00              | 87.50             | 50.00         | 93.75  | 65.00            | 85.00  | 50.00   | 25.00  | 69.38 |
| 6    | 37.50  | 100.00           | 62.50              | 87.50             | 50.00         | 87.50  | 40.00            | 85.00  | 58.33   | 50.00  | 65.83 |
| 7    | 75.00  | 100.00           | 100.00             | 100.00            | 50.00         | 100.00 | 100.00           | 100.00 | 25.00   | 100.00 | 85.00 |
| 8    | 62.50  | 91.67            | 100.00             | 62.50             | 87.50         | 50.00  | 35.00            | 100.00 | 83.33   | 75.00  | 74.75 |
| 9    | 75.00  | 100.00           | 87.50              | 100.00            | 75.00         | 100.00 | 100.00           | 100.00 | 75.00   | 75.00  | 88.75 |
| 10   | 100.00 | 100.00           | 100.00             | 75.00             | 75.00         | 75.00  | 80.00            | 75.00  | 75.00   | 62.50  | 81.75 |
| 11   | 100.00 | 100.00           | 87.50              | 100.00            | 100.00        | 87.50  | 100.00           | 100.00 | 25.00   | 75.00  | 87.50 |
| 12   | 75.00  | 100.00           | 87.50              | 75.00             | 100.00        | 87.50  | 65.00            | 55.00  | 41.67   | 62.50  | 74.92 |
| 13   | 100.00 | 100.00           | 100.00             | 75.00             | 87.50         | 100.00 | 100.00           | 75.00  | 66.67   | 50.00  | 85.42 |
| Mean | 80.77  | 93.59            | 82.69              | 85.58             | 75.00         | 84.62  | 78.85            | 85.77  | 60.26   | 59.62  | 78.67 |
