# Supplementary material
Source: publisher figshare collection journal article supplement (https://asha.figshare.com/articles/dataset/_/28489280)
Supplement: Supplementary file 2 [file 1]

**Supplemental Material S1.** Modified Canadian Occupational Performance Measure (mCOPM) scores.

| ID     | Importance | Performance | Satisfaction |
|--------|------------|-------------|--------------|
| 1      | 10         | 8           | 9            |
| 2      | 6          | 8           | 8            |
| 3      | 9          | 9           | 9            |
| 4      | 10         | 6           | 4            |
| 5      | 10         | 8           | 5            |
| 6      | 10         | 5           | 5            |
| 7      | 10         | 10          | 10           |
| 8      | 10         | 7           | 2            |
| 9      | 10         | 7           | 7            |
| 10     | 8          | 8           | 9            |
| 11     | 8          | 8           | 8            |
| 12     | 10         | 9           | 9            |
| 13     | 9          | 7           | 8            |
| Median | 10         | 8           | 8            |
| [IQR]  | [9 – 10]   | [7 – 8]     | [5 – 9]      |

mCOPM scores range from 0-10; 0 indicates the lowest perceived importance, performance, or satisfaction and 10 indicates the highest perceived importance, performance, or satisfaction.
